# Supplementary material for: Synthesis of polyurethane/vinyl polymer hybrids with unexpected mechanical properties using a macro chain transfer agent
Source: Royal Society of Chemistry journal article supplement (doi:10.1039/d5ra01234a), 2025-01-01
Supplement: d5ra01234a1.pdf [file d5ra01234a1.pdf]

*Supporting Information*

Synthesis of Polyurethane/Vinyl Polymer Hybrids with Unexpected  
Mechanical Properties Using a Macro Chain Transfer Agent

**Ryota Uchida, Seima Kondo, Akinori Takasu\***

*Division of Soft Materials,  
Department of Engineering, Nagoya Institute of Technology,  
Gokiso-cho, Showa-ku, Nagoya 466-8555, Japan*

\*To whom correspondence should be addressed: e-mail: [takasu.akinori@nitech.ac.jp](mailto:takasu.akinori@nitech.ac.jp)

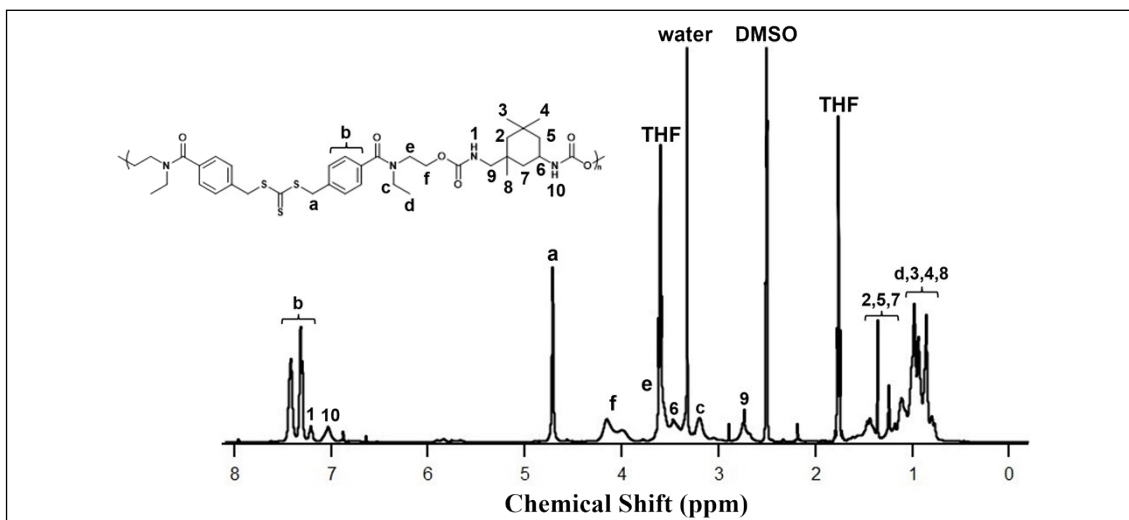

**Figure S1.**  $^1\text{H}$  NMR spectrum of PU-TTC from Run 3 in Table 1 prepared in  $\text{DMSO-}d_6$ .

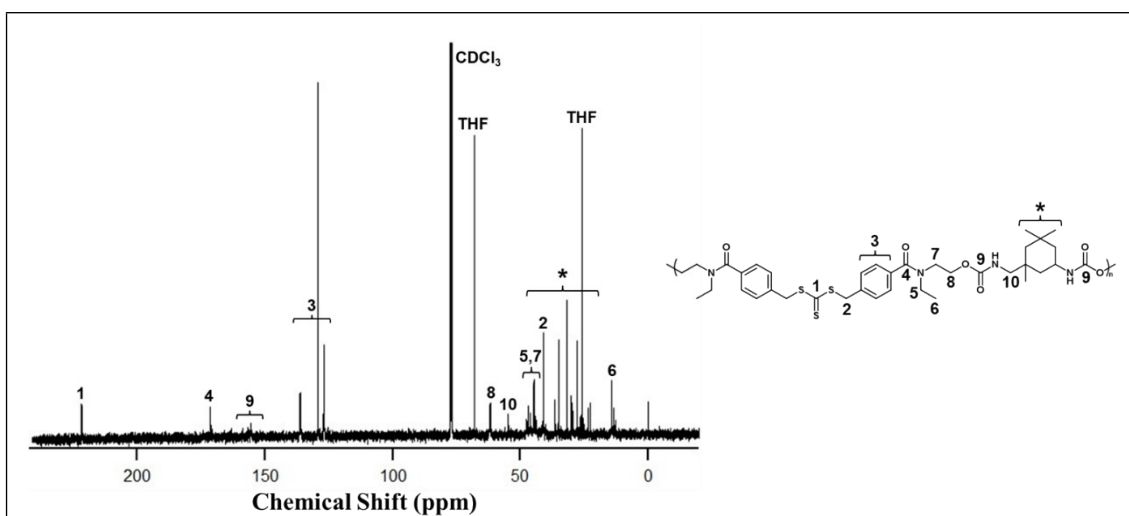

**Figure S2.**  $^{13}\text{C}$  NMR spectrum of PU-TTC from Run 3 in Table 1 prepared in  $\text{CDCl}_3$ .

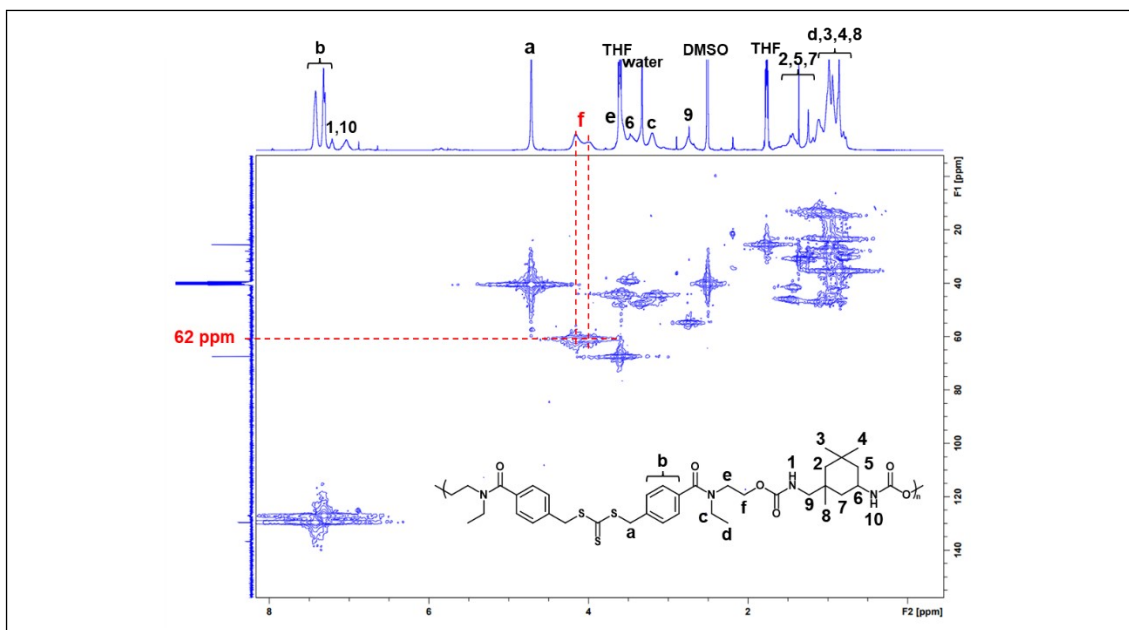

**Figure S3.** HMQC spectrum of PU-TTC from Run 3 in Table 1 prepared in DMSO- $d_6$ .

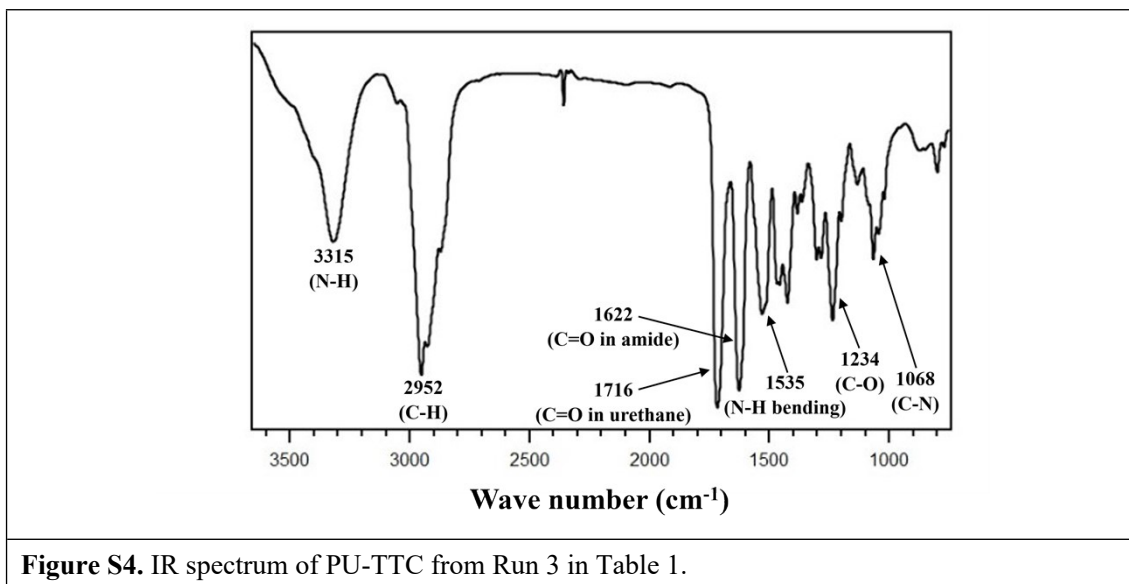

**Figure S4.** IR spectrum of PU-TTC from Run 3 in Table 1.

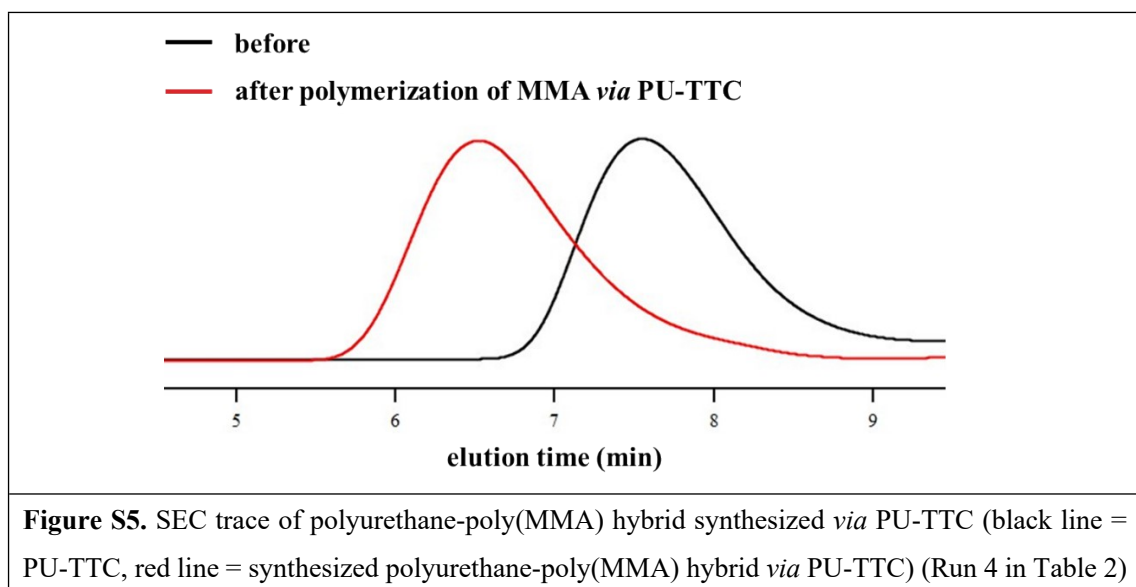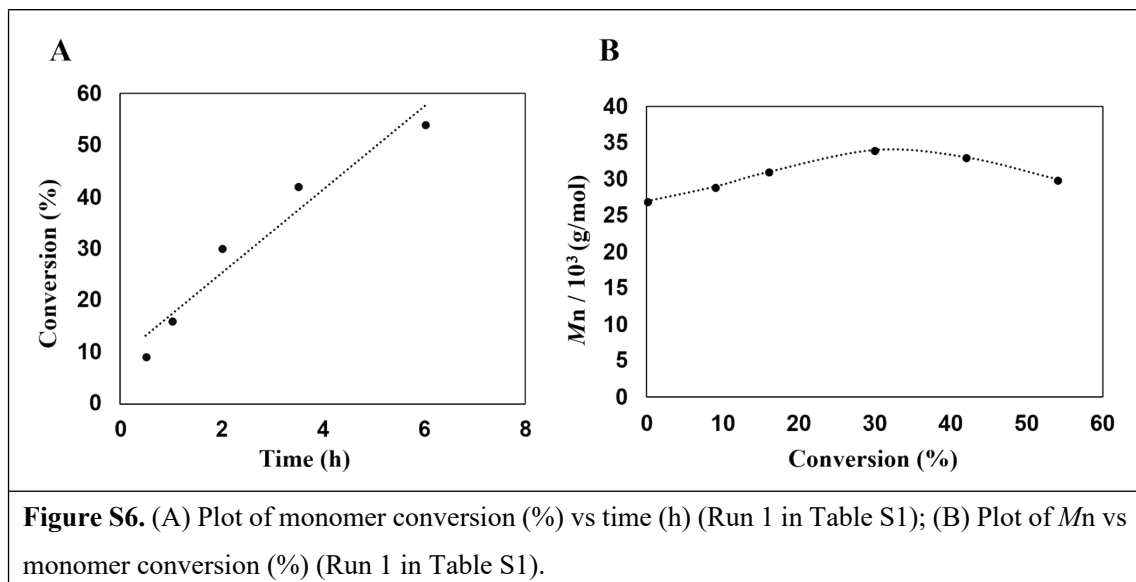

**Table S1.** RAFT polymerization of MMA using PU-TTC.<sup>a,b</sup>

| Run | $[M]_0/[TTC]_0$ | $[M]_0$<br>(mol/L) | Radical trigger | Time<br>(h) | Conv. <sup>c</sup><br>(%) | $M_n^d$<br>(kg/mol) |
|-----|-----------------|--------------------|-----------------|-------------|---------------------------|---------------------|
| 1   | 100             | 2.0                | Redox-LED       | 8           | 54                        | 30.4                |

<sup>a</sup> Polymerization using PU-TTC (run 3 in Table 1) as chain transfer agent. <sup>b</sup> Polymerization with Ir(ppy)<sub>3</sub> as a redox catalyst by blue-LED irradiation. <sup>c</sup> Calculated from <sup>1</sup>H NMR in CDCl<sub>3</sub>. <sup>d</sup> Determined by SEC with poly(methyl methacrylate) standards.

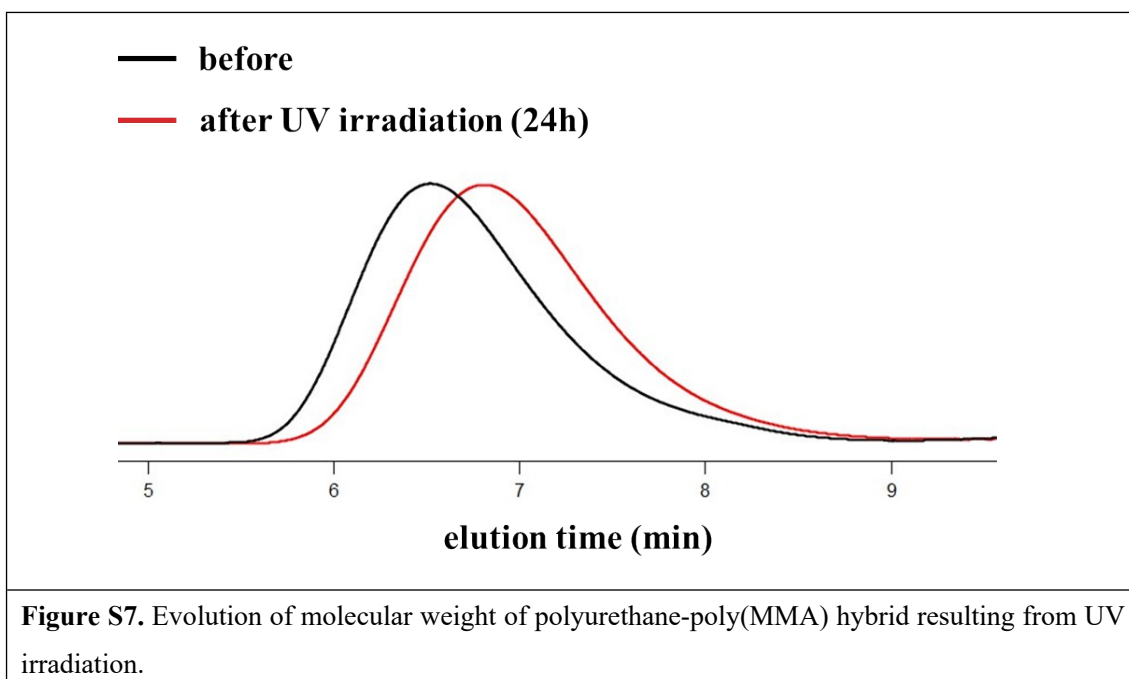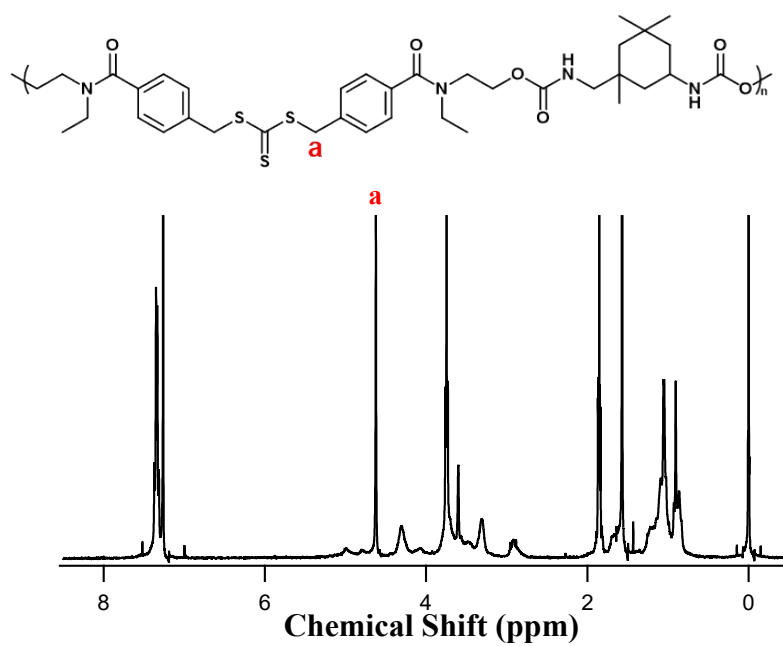

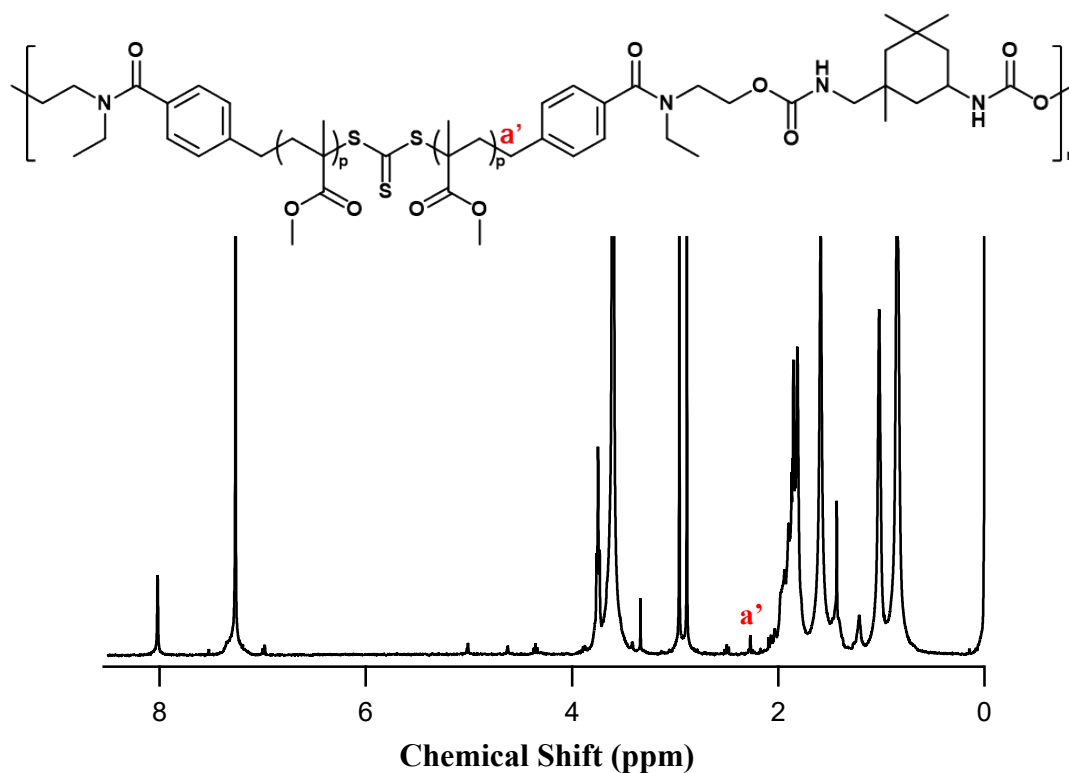

**Figure S9.**  $^1\text{H}$  NMR spectrum of polyurethane-PMMA hybrid in  $\text{CDCl}_3$ .

□

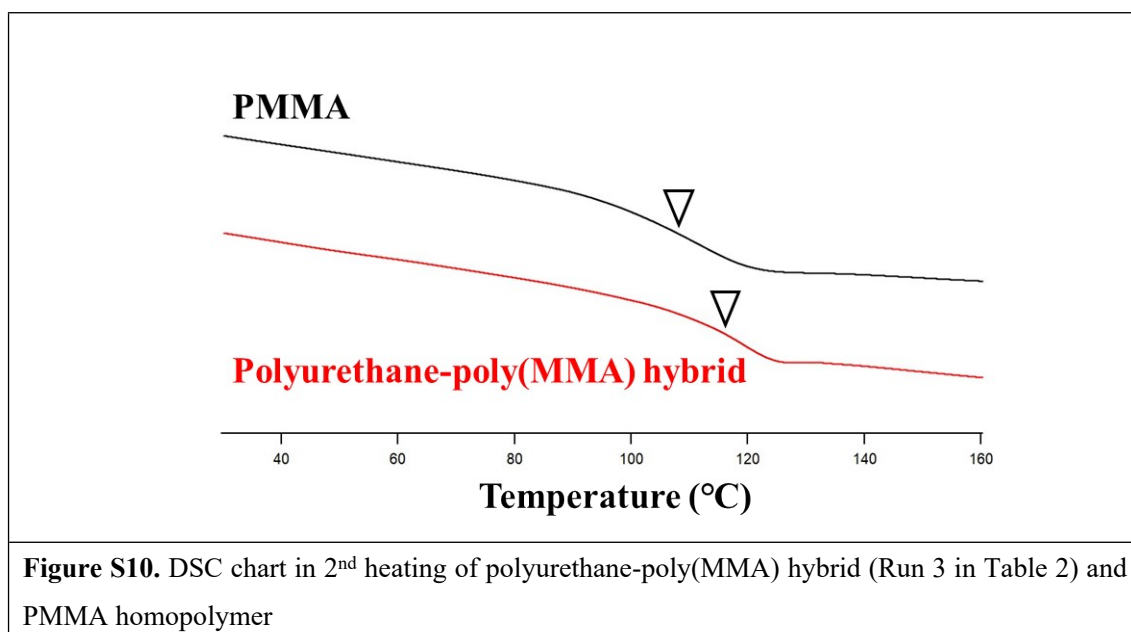

**Figure S10.** DSC chart in 2<sup>nd</sup> heating of polyurethane-poly(MMA) hybrid (Run 3 in Table 2) and PMMA homopolymer

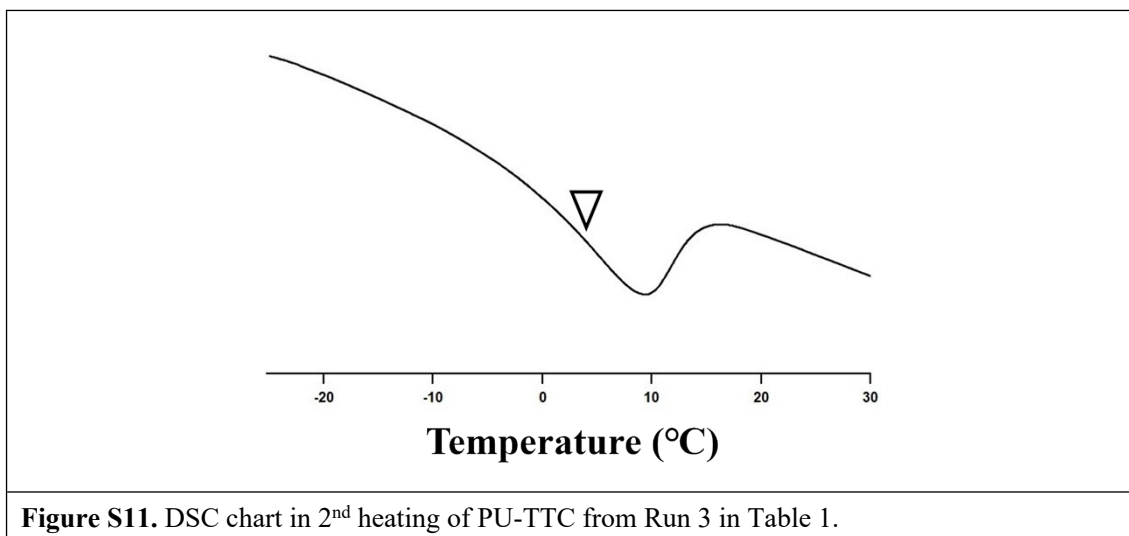

**Table S2.** Transmittance of polyurethane-poly(MMA) and PMMA homopolymer.

| Sample                          | $M_n^a$<br>(kg/mol) | $M_w/M_n^a$ | Transmittance(590nm)<br>(%) |
|---------------------------------|---------------------|-------------|-----------------------------|
| PMMA homopolymer <sup>b</sup>   | 173                 | 1.98        | 86.0                        |
| Poly(urethane-MMA) <sup>b</sup> | 79.8                | 2.20        | 7.3                         |

<sup>a</sup>Determined by SEC with a standard series of poly(methyl methacrylate)s.

<sup>b</sup>Thickness of the specimen were 0.90 mm (PMMA homopolymer) and 0.96 mm (poly(urethane-MMA)) respectively.

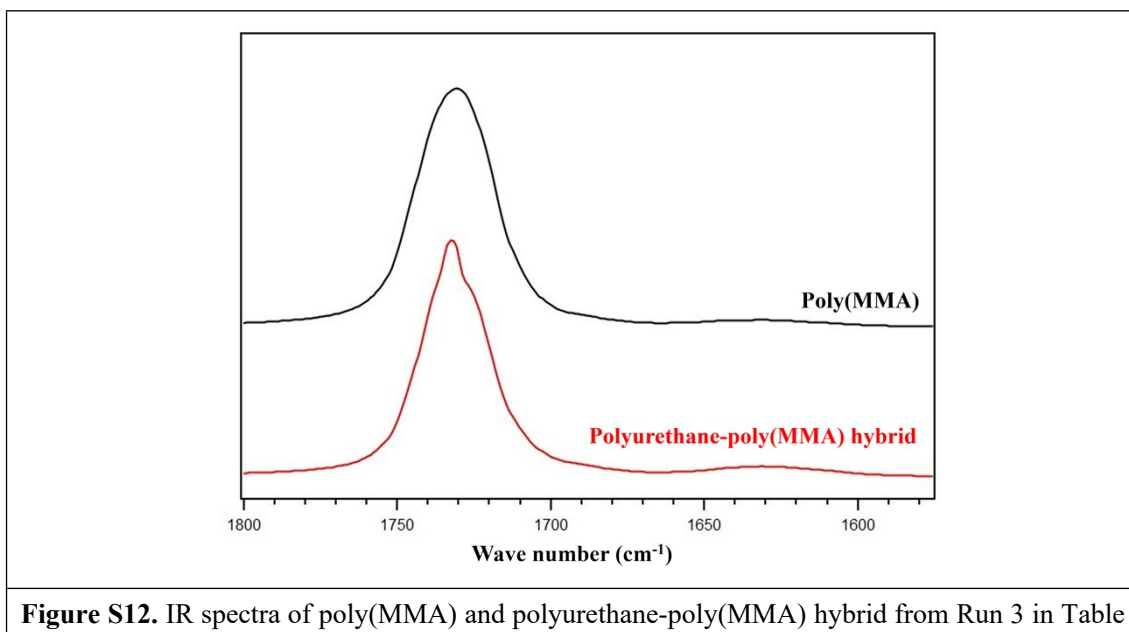

2.

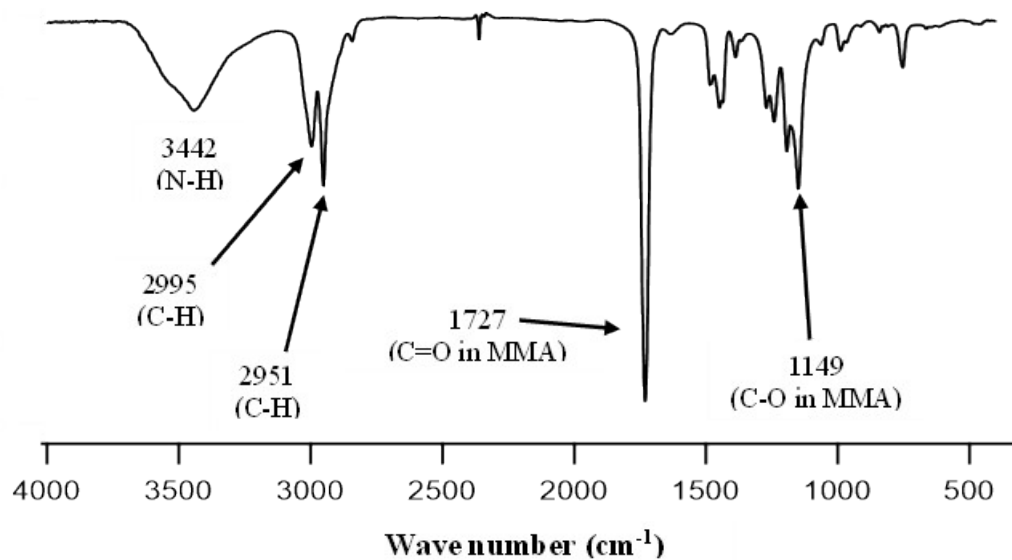

**Figure S13.** IR spectrum of poly(urethane-MMA).



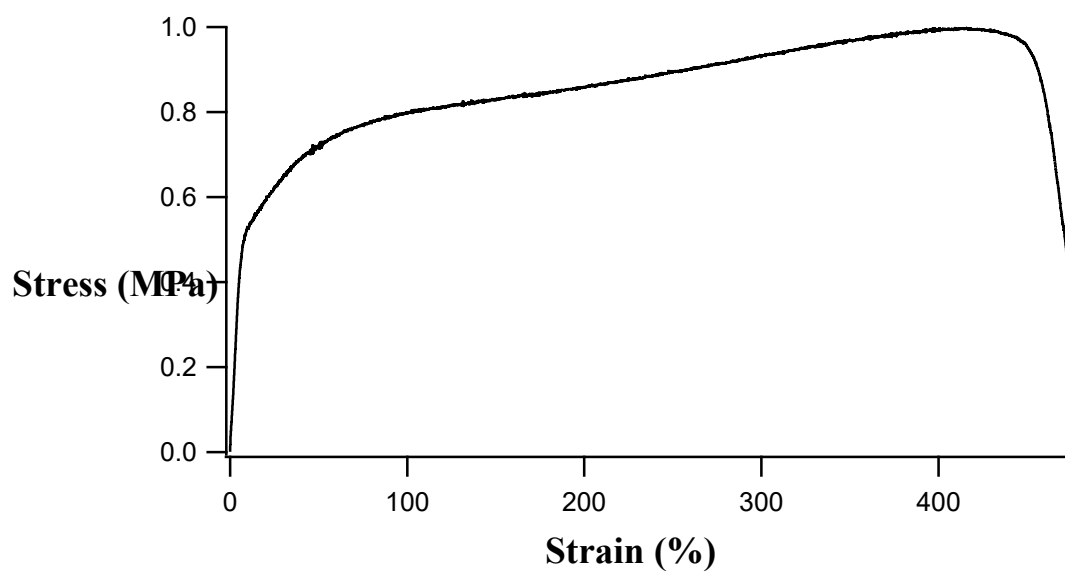

**Figure S14.** Stress-strain curves of PU-TTC.
